# Supplementary material for: Diversity and Potential Multifunctionality of Archaeal CetZ Tubulin-like Cytoskeletal Proteins
Source: Preprints.org preprint supplement (doi:10.20944/preprints202211.0451.v1), 2022-11-24
Supplement: Supplementary file 1 [file supplementary]

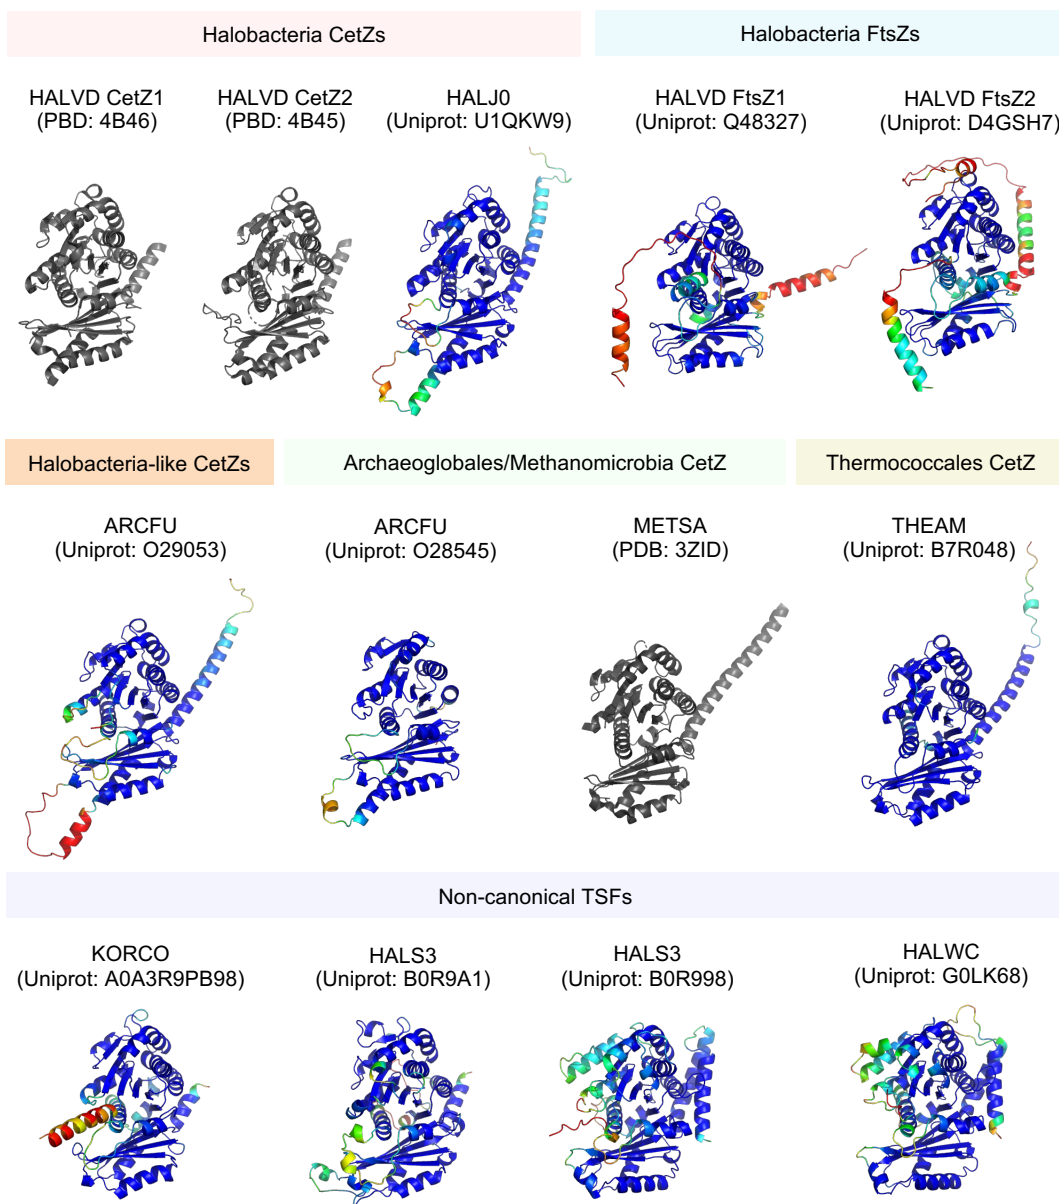

**Figure S1. Structures of archaeal TSF proteins.** Crystal structures and AlphaFold predictions of archaeal TSF proteins from key phylogenetic groups, including FtsZs, CetZs, and CetZ sub-families or groupings. AlphaFold predicted structures are coloured by prediction confidence, where blue indicates high confidence, cyan/green indicates medium confidence and red indicates low confidence. Crystal structures are coloured in grey. Species abbreviations: HALVD: *Haloferax volcanii*; HALJ0: *Halonotius* sp. J07HN4; ARCFU: *Archaeoglobus veneficus*; METSA: *Methanosaeta thermophila*; THEAM: *Thermococcus* sp. AM4; KORCO: *Candidatus Korarchaeum cryptofilum* OPF8; HALS3: *Halobacterium salinarum* R1; HALWC: *Haloquadratum walsbyi*.

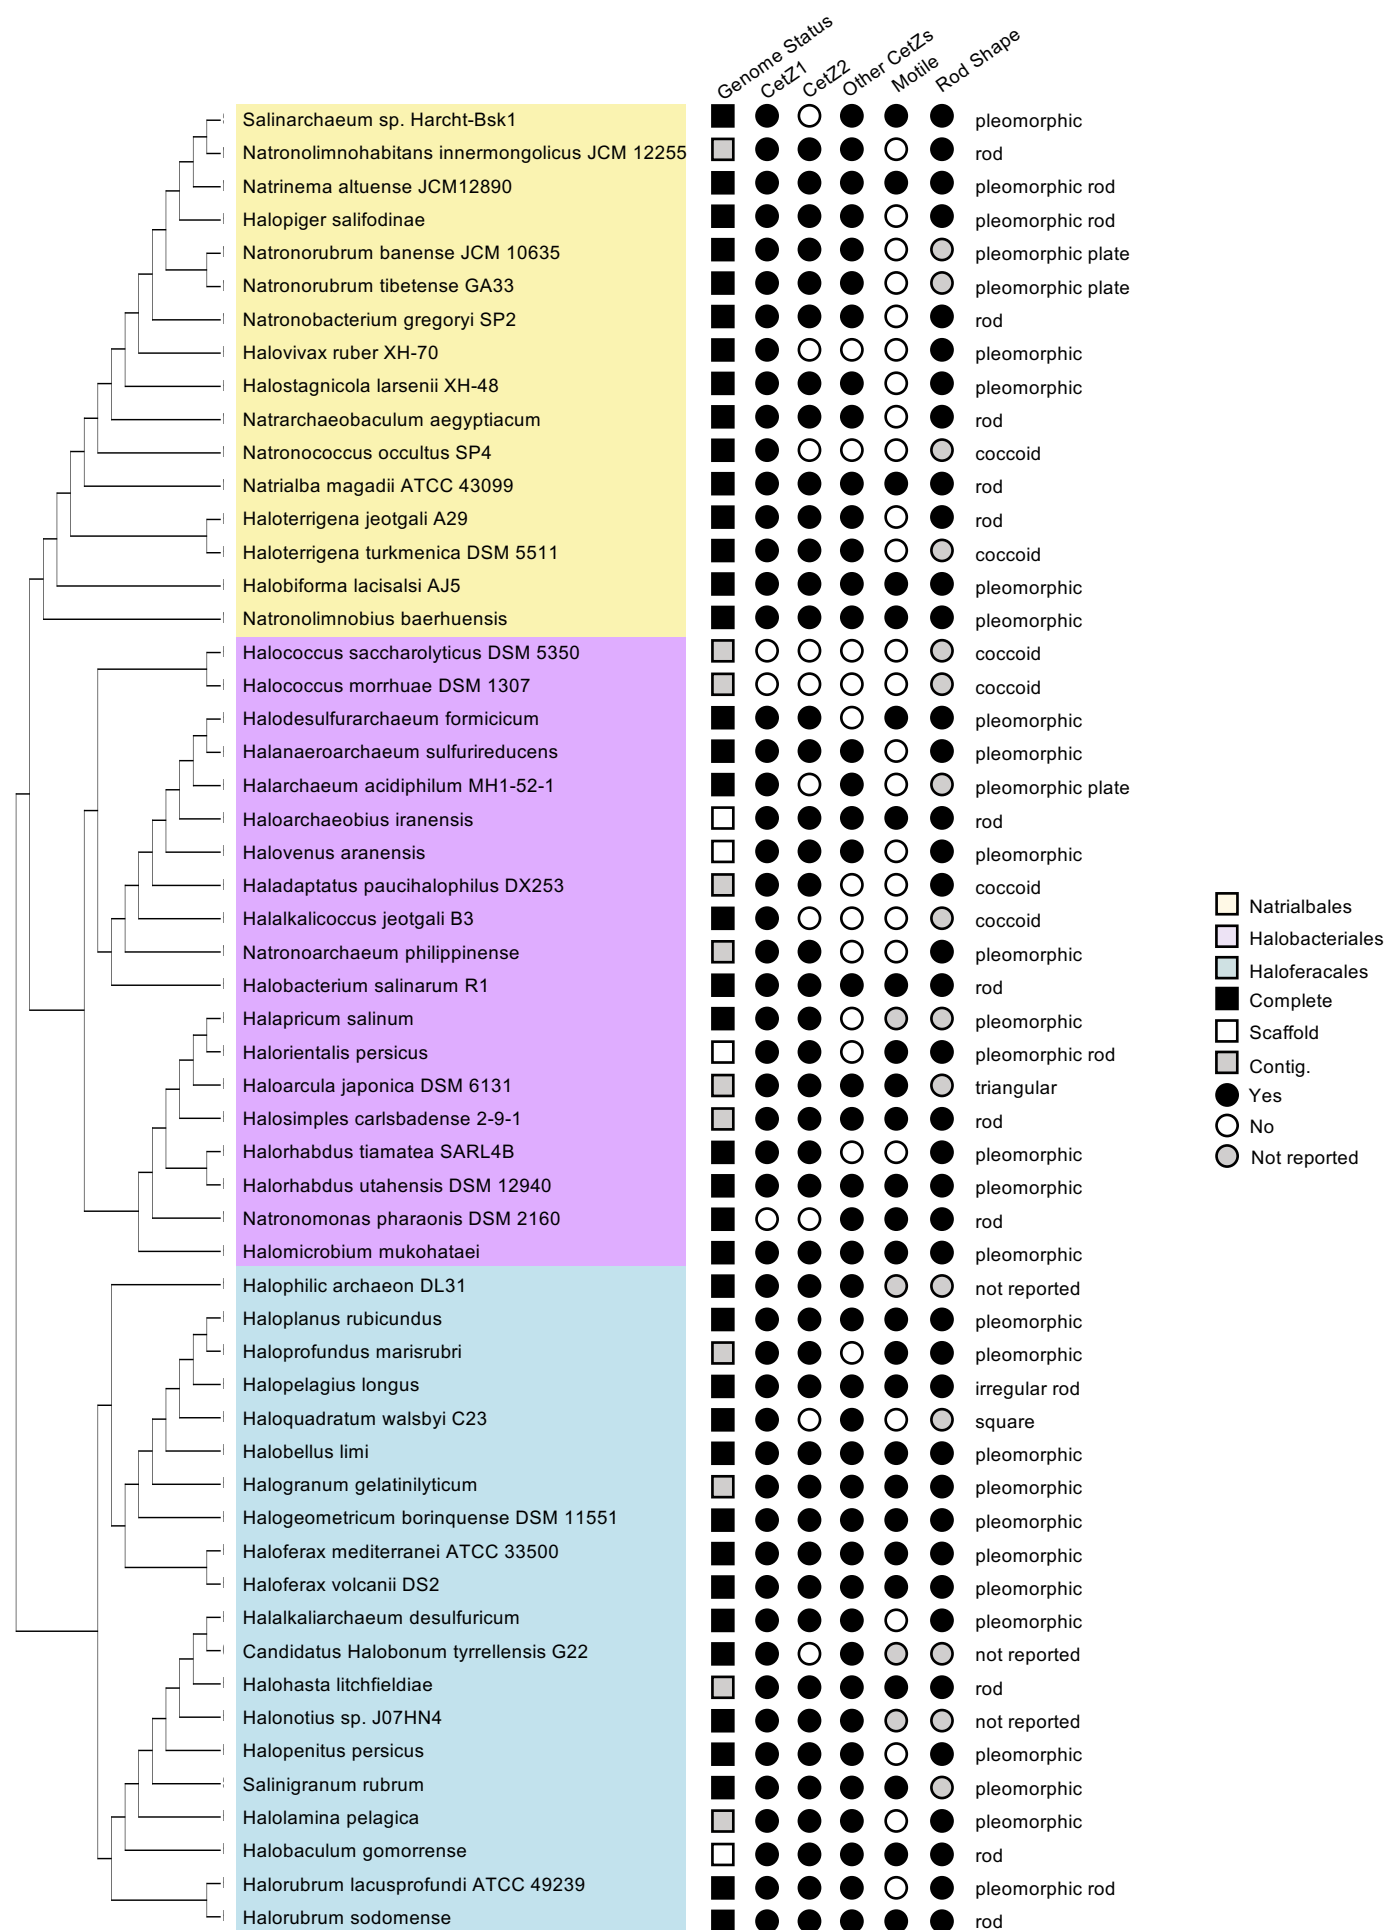

**Figure S2. The distribution of CetZ1 and CetZ2 in Halobacteria compared to motility and cell morphologies.** Extended data from Figure 4.

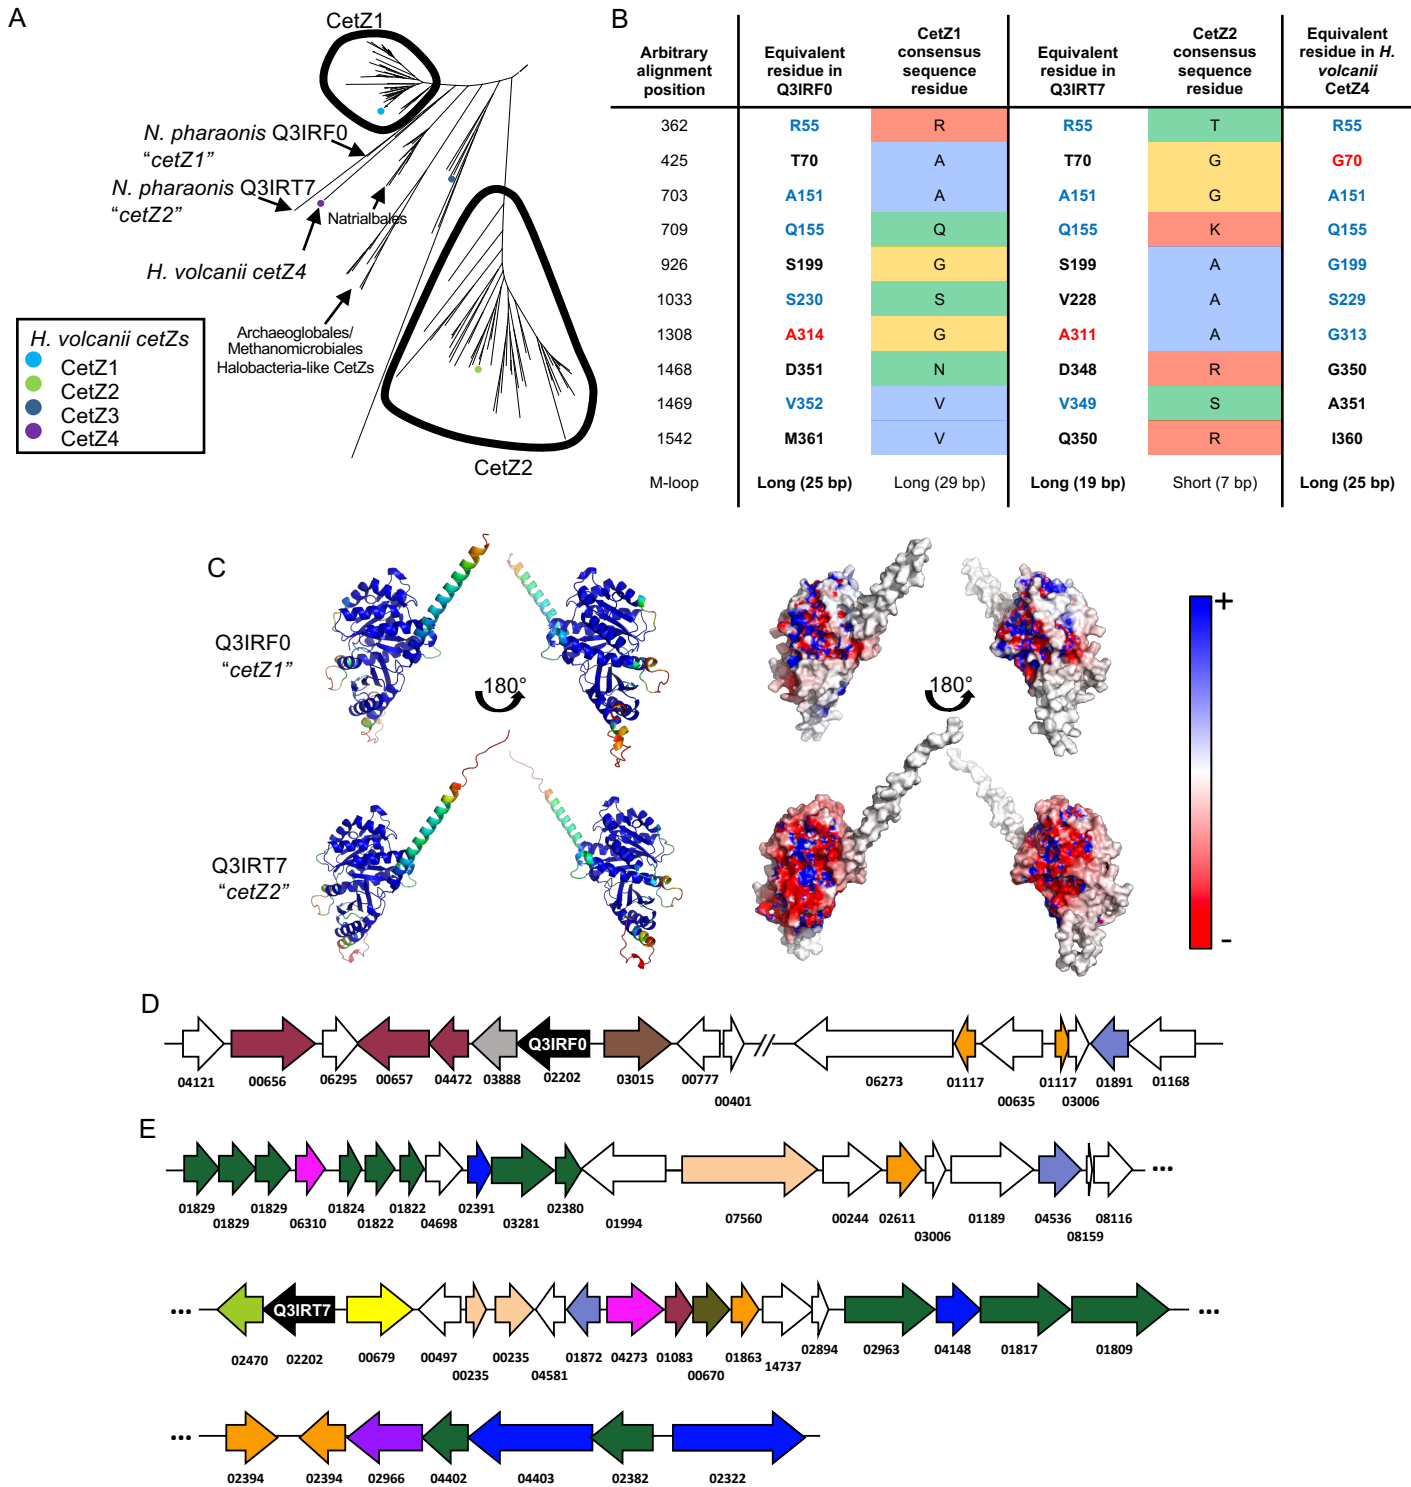

**Figure S3. *Natronomonas pharaonis* cetZs. A)** Crop of phylogram in Fig. 1 Distribution of *N. pharaonis* CetZs (Q3IRF0 and Q3IRT7) relative to Haloarchaeal CetZ clusters. *H. volcanii* CetZ1-4 are marked on the phylogram as indicated in the key. **B)** Unique residue table comparing the defined unique residues of CetZ1 and CetZ2 proteins with Q3IRF0 “cetZ1” and Q3IRT7 “cetZ2” from *N. pharaonis*, and CetZ4 from *H. volcanii* which branches closely with both Q3IRF0 and Q3IRT7. Consensus residues of CetZ1 and CetZ2 are coloured according to chemistry. Red: positively charged; blue: hydrophobic; green: polar; yellow: glycine. Equivalent residues of Q3IRF0, Q3IRT7, and *H. volcanii* CetZ4 which match the CetZ1 consensus residue are coloured in blue, those which match the CetZ2 consensus residue are coloured in red, and those which do not match either consensus residue are in black. **C)** AlphaFold predictions of *N. pharaonis* CetZs, coloured by prediction confidence, where blue indicates high confidence, cyan/green indicates medium confidence and red indicates low confidence. **D)** The genomic region of *N. pharaonis* Q3IRF0, annotated as cetZ1, showed similar genomic organization and conservation of genes often observed in the cetZ1 genomic region (Fig. 5). Genes belonging to arCOGs observed in majority of cetZ1 genomic regions are coloured according to COG categories (Table S3). Genes encoding uncharacterized proteins which belonged to arCOGs present in majority of cetZ1 regions are coloured in grey, and arCOGs not observed in majority of cetZ1 regions are coloured in white. **E)** The genomic region of *N. pharaonis* Q3IRT7, annotated as cetZ2, was not consistent with the commonly observed genomic organization of other cetZ2 regions. None of the identified top arCOGs in cetZ2 genomic regions (Fig. 6) were present in the genomic region of Q3IRT7. Therefore, genes are coloured according to their COG categories (Table S3) to indicate general function, and uncharacterized proteins are represented in white.

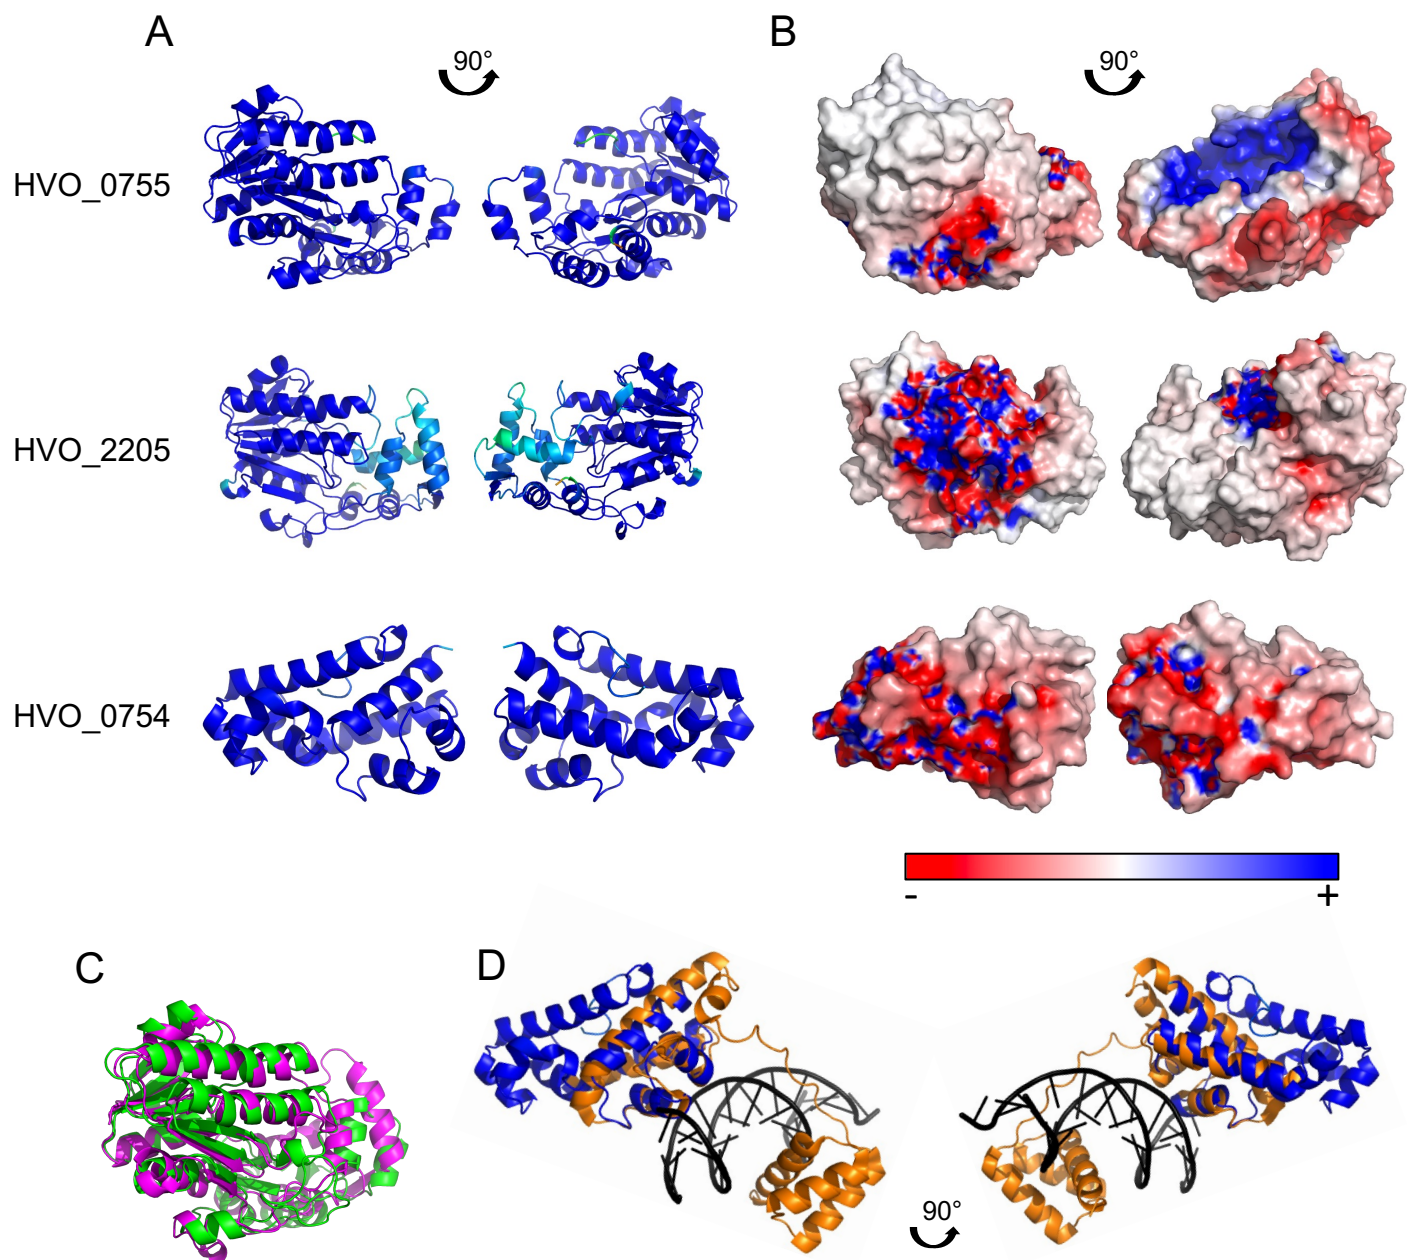

**Figure S4. AlphaFold predictions of highly conserved genes within *cetZ1* and *cetZ2* genomic regions.** HVO\_2205 (*noIA*) and HVO\_0755 were both annotated as NAD-dependent epimerase dehydratases and were conserved within majority of *cetZ1* and *cetZ2* genomic regions, respectively. HVO\_0754 was previously annotated as a predicted transcription factor in the eggNOG database, however has an updated annotation as an uncharacterized protein implicated by homology in intracellular trafficking and secretion. **A)** AlphaFold predicted structures are coloured by confidence, where blue indicates high confidence, cyan/green indicates medium confidence and red indicates low confidence. **B)** Surface charges were calculated using pymol. **C)** HVO\_2205 (magenta) and HVO\_0755 (green) appear to be structurally homologous and have an RMSD of 3.314. **D)** Structural alignment of HVO\_0754 (blue) with transcriptional regulator Bm-5 (orange) from *Homo sapiens* (PDB: 3D1N, subunit I). This protein was a highly-scored match to HVO\_0754 using the Dali server, with an overall Z-score of 6.5, RMSD of 1.9, 149 aligned residues, and a sequence identity of 12%. This structural analysis of HVO\_0754 implicates it as a transcriptional regulator in accordance with its old annotation on the eggNOG database.



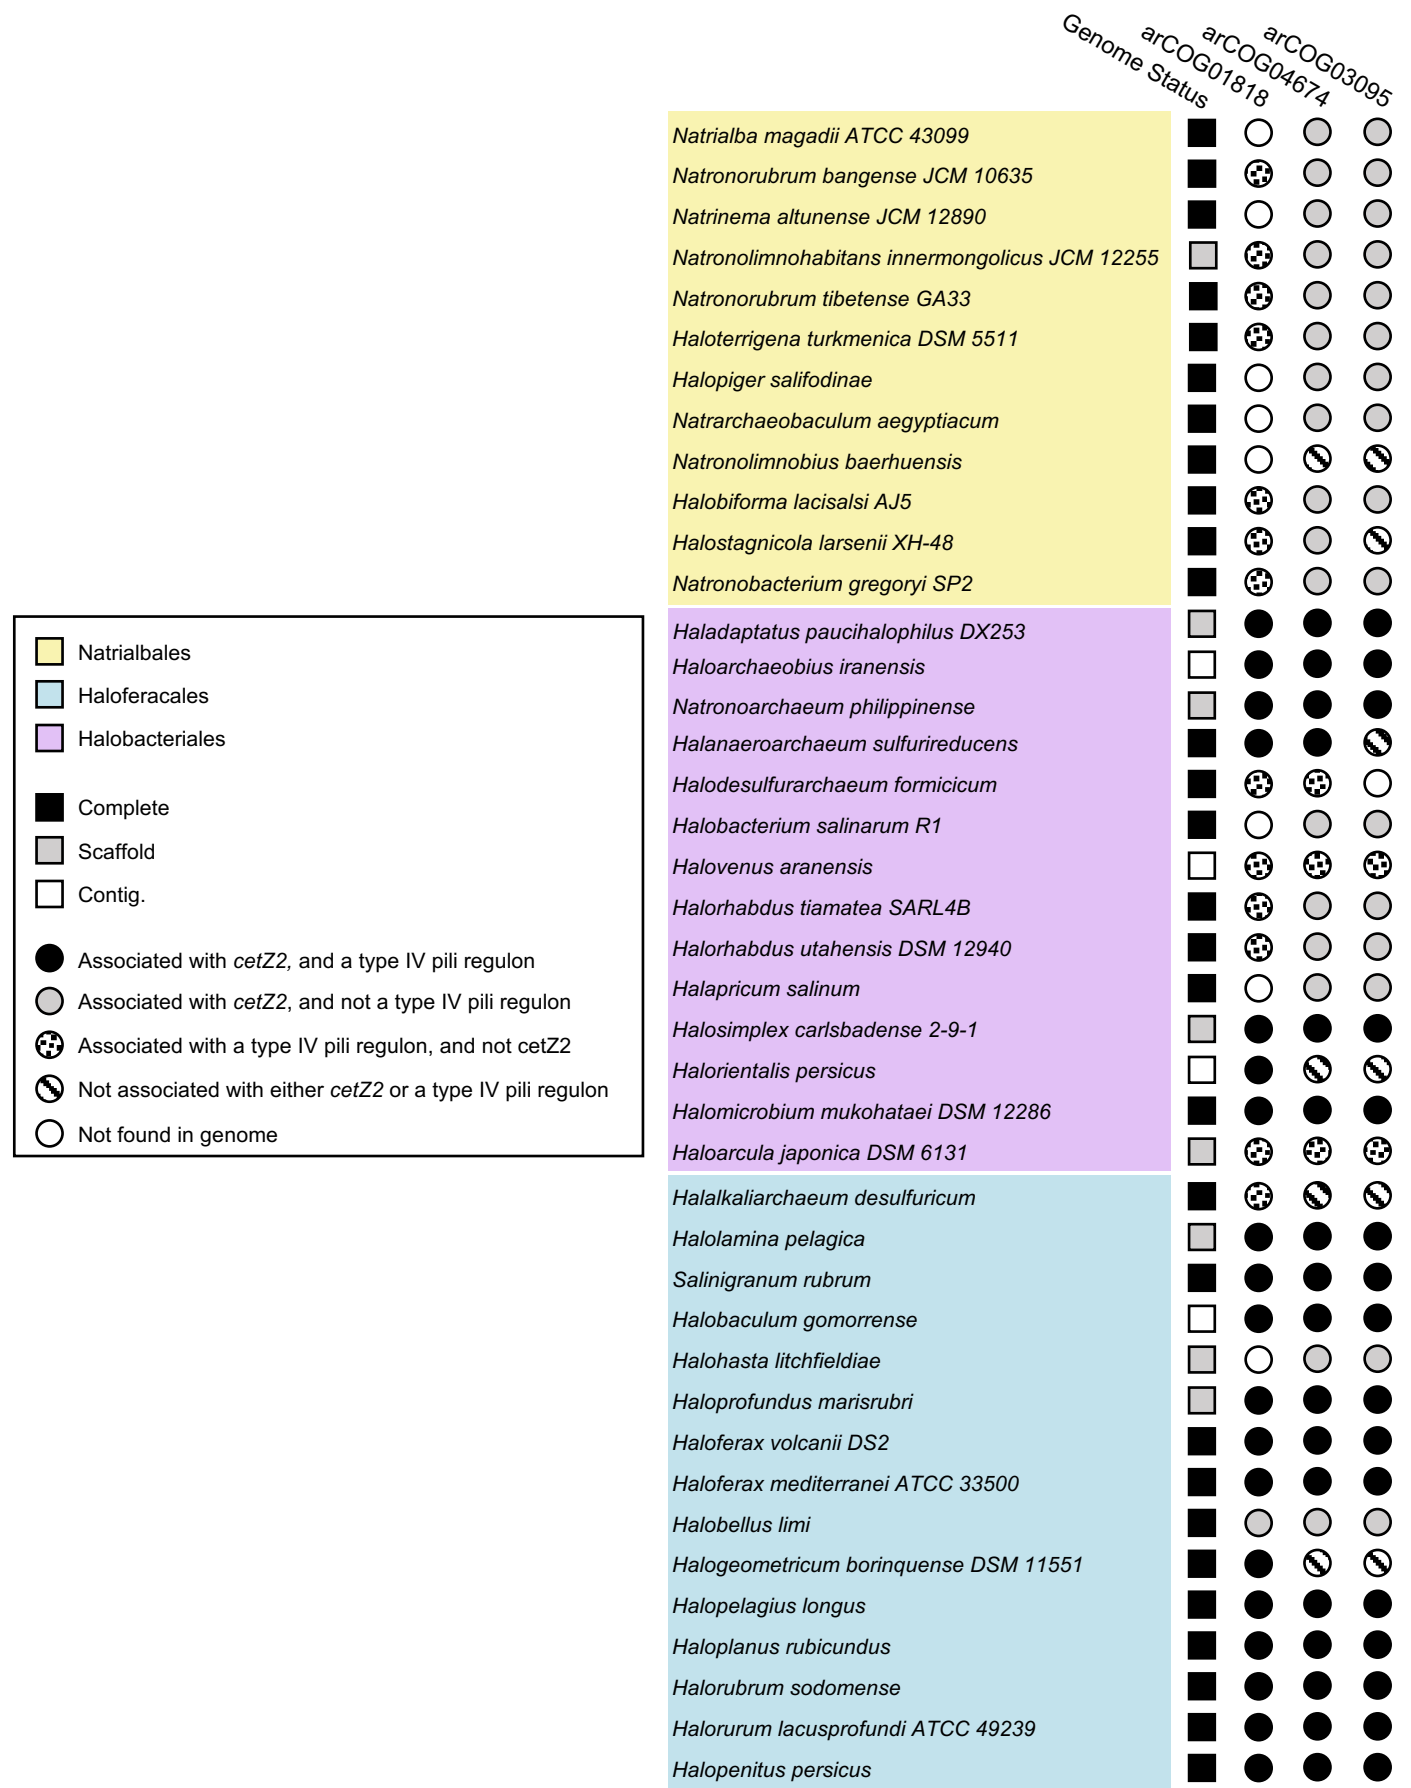

**Figure S5. Synteny of *cetZ2*, *pilB2* (arCOG01818), arCOG04674, and arCOG03095.** Extended data from Figure 7. arCOGs were classified as ‘associated with *cetZ2*’ if found within 20 kb either side of the *cetZ2* gene. arCOGs ‘associated with a type IV pili regulon’ were defined as those found within or adjacent to other arCOGs identified in the *H. volcanii* PilB2C2 regulon.
